# Supplementary material
Source: PubMed Central journal article supplement (PMC7238475)
Supplement: Supplemental_Material2.pdf [file Supplemental_Material2.pdf]

Supplementary Material 2.

2.1. Broadly speaking, how do you perceive the issue of fluid overload (positive fluid balance with oedema) in ICU patients? (N=367), a comparison of responses from UK and non-UK specialists.

|                                                                                                 |         | Strongly agree |       | Agree |       | Uncertain /<br>neither agree nor<br>disagree |       | Disagree |       | Strongly<br>disagree |       | Total | P     |
|-------------------------------------------------------------------------------------------------|---------|----------------|-------|-------|-------|----------------------------------------------|-------|----------|-------|----------------------|-------|-------|-------|
| An inevitable consequence of appropriate fluid resuscitation in the presence of capillary leak: | UK:     | 42             | 22.5% | 112   | 59.9% | 18                                           | 9.6%  | 14       | 7.5%  | 1                    | 0.5%  | 187   | 0.03  |
|                                                                                                 | Non-UK: | 42             | 23.9% | 74    | 42.1% | 17                                           | 15.3% | 29       | 16.5% | 4                    | 2.3%  | 176   |       |
| A modifiable consequence of fluid administration from multiple sources                          | UK:     | 29             | 15.3% | 126   | 66.7% | 25                                           | 13.2% | 8        | 4.2%  | 1                    | 0.5%  | 189   | <0.01 |
|                                                                                                 | Non-UK: | 46             | 26.3% | 108   | 61.7% | 17                                           | 9.7%  | 4        | 2.3%  | 0                    | 0%    | 175   |       |
| A manifestation of sodium and water retention due to endocrine factors and acute kidney injury  | UK:     | 12             | 6.4%  | 124   | 66.0% | 33                                           | 17.6% | 18       | 9.6%  | 1                    | 0.5%  | 188   | 0.23  |
|                                                                                                 | Non-UK: | 17             | 9.7%  | 93    | 52.8% | 45                                           | 25.6% | 18       | 10.2% | 3                    | 1.7%  | 176   |       |
| An issue which will resolve spontaneously with resolution of the underlying illness             | UK:     | 19             | 10.2% | 92    | 49.2% | 38                                           | 20.3% | 37       | 19.8% | 1                    | 0.5%  | 187   | <0.01 |
|                                                                                                 | Non-UK: | 11             | 6.4%  | 44    | 25.4% | 53                                           | 30.6% | 53       | 30.6% | 12                   | 6.9%  | 173   |       |
| A finding without clinical consequence                                                          | UK:     | 1              | 0.5%  | 3     | 1.6%  | 6                                            | 3.2%  | 96       | 51.3% | 81                   | 43.3% | 187   | <0.05 |
|                                                                                                 | Non-UK: | 2              | 1.2%  | 6     | 3.5%  | 18                                           | 10.3% | 43       | 24.7% | 105                  | 60.3% | 174   |       |
| A modifiable source of morbidity                                                                | UK:     | 46             | 24.5% | 108   | 57.5% | 22                                           | 11.7% | 8        | 4.3%  | 4                    | 2.1%  | 188   | <0.01 |
|                                                                                                 | Non-UK: | 83             | 47.4% | 72    | 41.1% | 16                                           | 9.1%  | 3        | 1.7%  | 1                    | 0.6%  | 175   |       |

2.2 Preferred initial responses to fluid removal, a comparison between UK and non-UK specialists (N=393, P=0.02),

|                                                                                               | Non-UK     | UK          | Total       |
|-----------------------------------------------------------------------------------------------|------------|-------------|-------------|
| Intermittent bolus loop diuretic                                                              | 20 (13.2%) | 11 (4.5%)   | 31 (7.9%)   |
| Intermittent bolus loop diuretic<br>+ regular administration of hyperoncotic albumin solution | 16 (10.6%) | 31 (12.8%)  | 47 (12.0%)  |
| Infusion of loop diuretic                                                                     | 22 (14.6%) | 42 (17.4%)  | 64 (16.3%)  |
| Infusion of loop diuretic<br>+ regular administration of hyperoncotic albumin solution        | 74 (49.0%) | 137 (56.6%) | 211 (53.7%) |
| Removal by dialysis / ultrafiltration                                                         | 18 (11.9%) | 21 (8.7%)   | 39 (9.9%)   |
| Intermittent bolus loop diuretic followed by infusion of loop diuretic                        | 1 (0.7%)   | 0 (0%)      | 1 (0.3%)    |
| Total                                                                                         | 151        | 242         | 393         |
